# Supplementary material for: Leafamine®, a Free Amino Acid-Rich Biostimulant, Promotes Growth Performance of Deficit-Irrigated Lettuce
Source: MDPI journal article supplement (doi:10.3390/ijms23137338), 2022-06-30
Supplement: s1 [file s1]

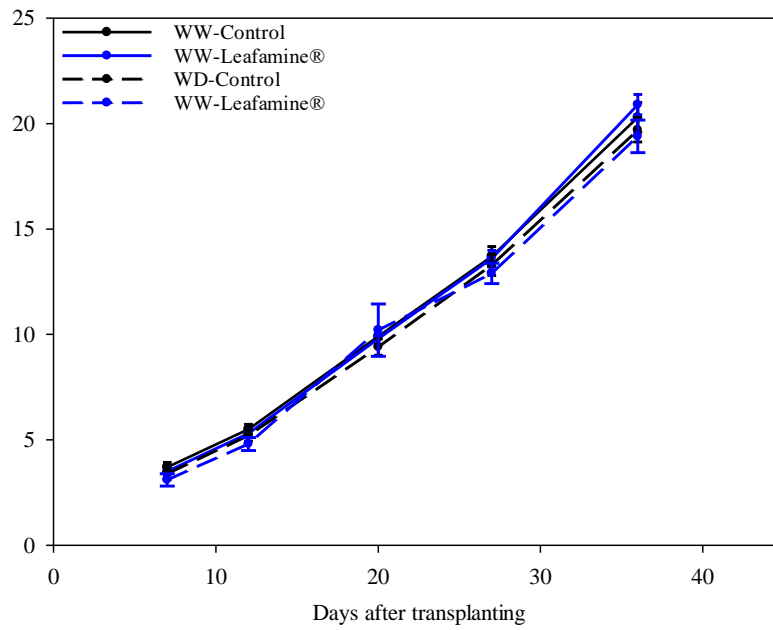

**Figure S1.** Leafamine® and water condition effects on number of unfolded leaves

Analysis of number of unfolded leaves of lettuces treated and untreated with Leafamine® (0.585g/pot) under well-watered and water deficient conditions. Data are expressed as means  $\pm$  standard errors of measures taken during the experiment (n=10 lettuces). At each date, values were compared by using two-way ANOVA. Abbreviations: WW-Control, Well-watered lettuces untreated; WW-Leafamine®, Well-watered lettuces treated with Leafamine®; WD-Control, Water-deficient lettuces untreated; WD-Leafamine®, Water-deficient lettuces treated with Leafamine®.

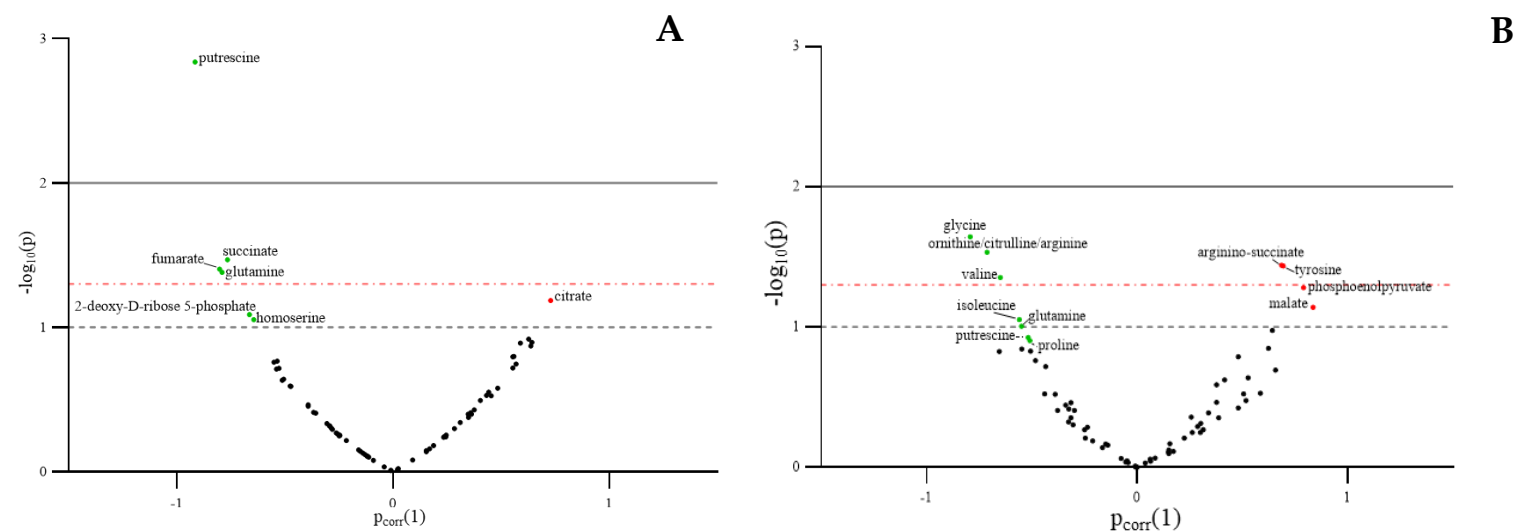

**Figure S2.** Leafamine® and water condition effects on metabolomics pattern of lettuce leaves 20 days after transplanting

Volcano plot illustrating identified metabolites (Leafamine® application vs control) in lettuces grown under well-watered (A) and water deficient conditions (B) 20 days after transplanting, with the  $p$ -value ( $y$ -axis) and the loading in the OPLS-DA (using treatment as ClassID, for each water condition) ( $x$ -axis). Coloured dots represent differentially expressed metabolites with statistical significance at  $p$ -value  $< 0.1$  and  $0.05$  (overhead horizontal dotted black and red line, respectively) and  $p$ -value  $< 0.01$  (overhead horizontal continuous black line). Green and red dots represent metabolites that are up-expressed and down-expressed in Leafamine®-treated and untreated lettuces respectively.

**Table S1.** Number of lettuces included in each experiment

| Water condition | Treatment                | Number of plants (n)                     |
|-----------------|--------------------------|------------------------------------------|
| Well-watered    | Control (water)          | 10 (trial 1), 12 (trial 2), 35 (trial 3) |
| Well-watered    | Leafamine® - 0,585 g/pot | 10 (trial 1), 12 (trial 2), 35 (trial 3) |
| Water deficient | Control (water)          | 10 (trial 1), 12 (trial 2), 35 (trial 3) |
| Water deficient | Leafamine® - 0,585 g/pot | 10 (trial 1), 12 (trial 2), 35 (trial 3) |

**Table S2.** General composition of Leafamine®

| Items                                             | Results |
|---------------------------------------------------|---------|
| Total amino acids ( <i>Method (EC) 152/2009</i> ) | 88.9 %  |
| Free amino acids ( <i>Method (EC) 152/2009</i> )  | 81.5 %  |
| Na                                                | 2.6 %   |
| Cl                                                | 2.5 %   |

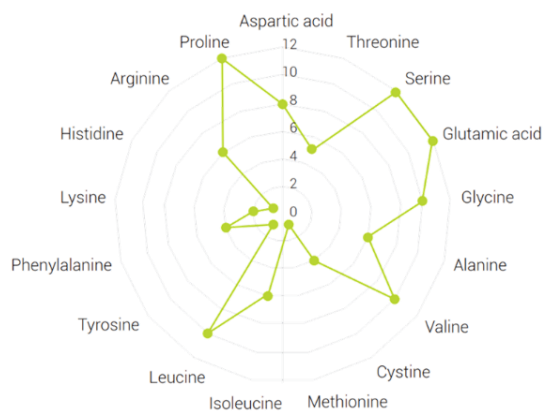

**Figure S3.** Total Amino Acids profile (in g/100g AA) of Leafamine®

**Table S3.** Details of Leafamine® composition

| Component     | Free amino acids | Total amino acids |
|---------------|------------------|-------------------|
| Aspartic acid | 6.7 %            | 6.8 %             |
| Threonine     | 4.4 %            | 4.4 %             |
| Serine        | 11.3 %           | 11.3 %            |
| Glutamic acid | 9.6 %            | 10 %              |
| Glycine       | 7.3 %            | 7.6 %             |
| Alanine       | 4.5 %            | 4.6 %             |
| Valine        | 5 %              | 7.5 %             |
| Cystine       | 1.1 %            | 1.9 %             |
| Methionine    | 0.4 %            | 0.4 %             |
| Isoleucine    | 3.1 %            | 4.3 %             |
| Leucine       | 6.1 %            | 6.8 %             |
| Tyrosine      | 0.6 %            | 0.9 %             |
| Phenylalanine | 4.2 %            | 4.4 %             |
| Lysine        | 1.5 %            | 1.7 %             |
| Histidine     | 0.6 %            | 0.7 %             |
| Arginine      | 5.3 %            | 5.8 %             |
| Proline       | 9.8 %            | 9.8 %             |
| <b>Total</b>  | <b>81.5 %</b>    | <b>88.9 %</b>     |

**Table S4.** Composition of peptide fraction (6%) in Leafamine®

| Peptide fraction | Results |
|------------------|---------|
| > 4 amino acids  | 7.3 %   |
| 3-4 amino acids  | 31.6 %  |
| 2-3 amino acids  | 61.1 %  |

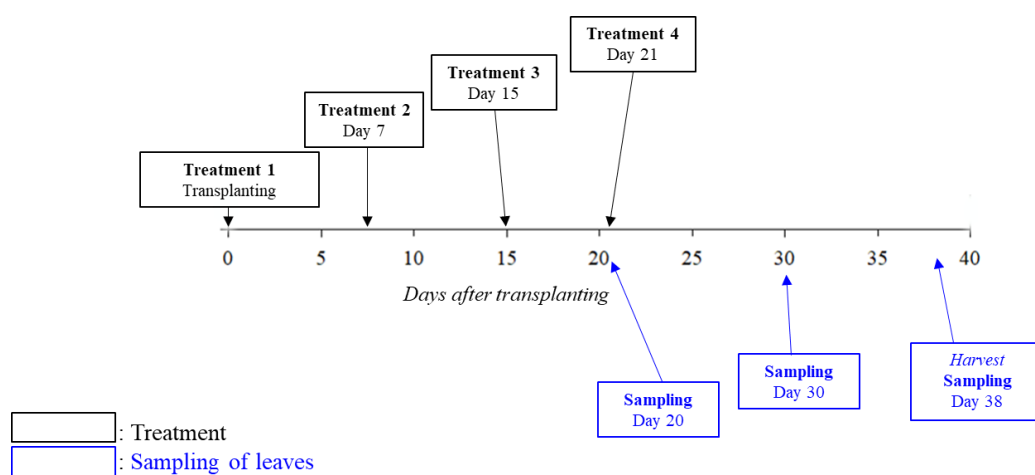

**Figure S4.** Treatment and sampling protocol of experiment
